# Supplementary material for: Methyl Gallate Alleviates Acute Ulcerative Colitis by Modulating Gut Microbiota and Inhibiting TLR4/NF-κB Pathway
Source: MDPI journal article supplement (doi:10.3390/ijms232214024), 2022-11-14
Supplement: s1 [file s1]

## Supplementary Materials for

# Methyl Gallate Alleviates Acute Ulcerative Colitis by Modulating Gut Microbiota and Inhibiting TLR4/NF- $\kappa$ B Pathway

Ping Zhou <sup>1,†</sup>, Jia Lai <sup>2,†</sup>, Yueyue Li <sup>1</sup>, Junzhu Deng <sup>1</sup>, Fei Yang <sup>2</sup>, Shuo Yang <sup>2</sup>, Yuesong Wu <sup>2</sup>, Xiaoqin Tang <sup>2</sup>, Feihong Huang <sup>2,4</sup>, Long Wang <sup>2,4</sup>, Xinwu Huang <sup>2,4</sup>, Qianqian Huang <sup>2,4</sup>, Wenjun Zou <sup>1,\*</sup>, Jianming Wu <sup>3,2,4\*</sup>

**Includes:** Figures S1, S2 and S3; Tables S1 and S2

## Supplementary Figure S1

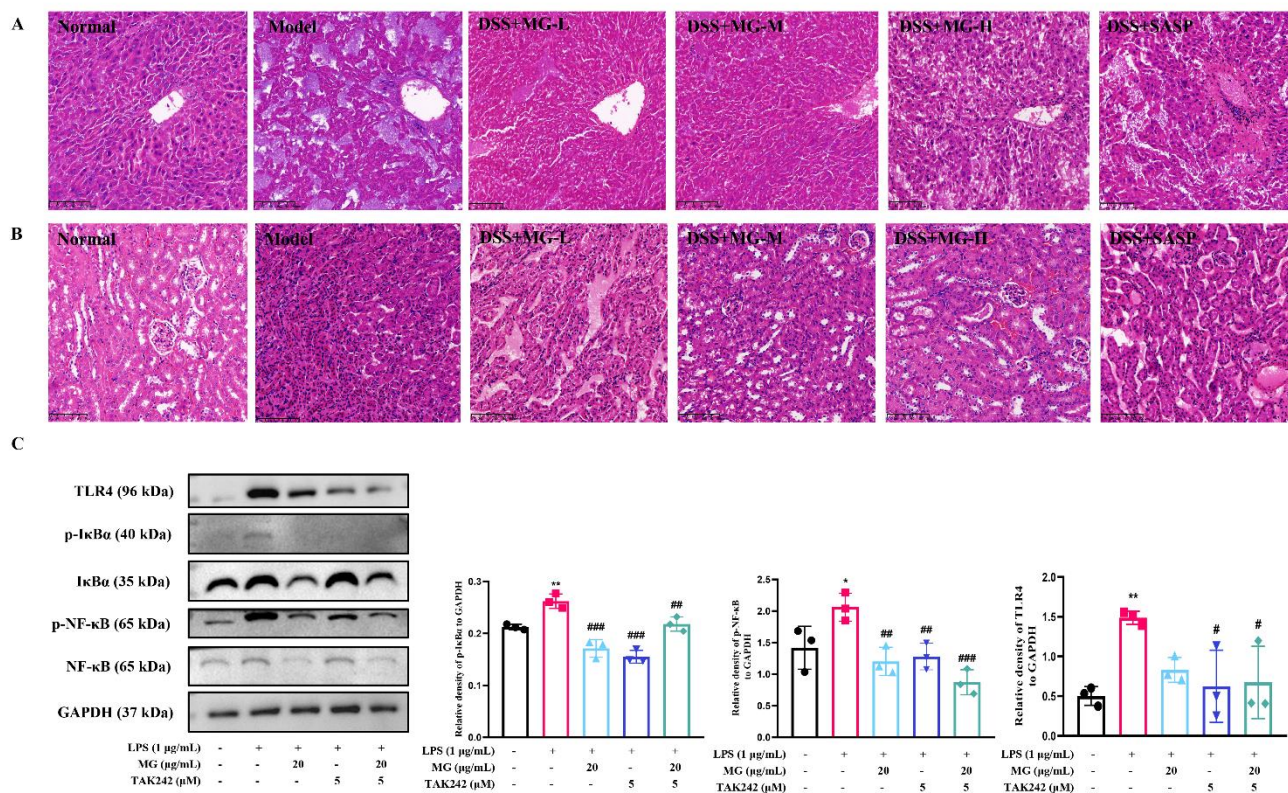

**Figure S1.** Histopathological observation of colon, liver, and kidney tissues in each group. (A, B) Representative sections H&E staining images of liver, and kidney tissue (200 $\times$ , scale bar: 100  $\mu$ m). MG and TAK242 inhibited the expression of TLR4/NF- $\kappa$ B signaling pathway in LPS-induced cells. Data were presented as the means  $\pm$  SEMs of three independent experiments. \* $p$  < 0.05, \*\* $p$  < 0.01, and \*\*\* $p$  < 0.001 vs the normal group; # $p$  < 0.05, ## $p$  < 0.01, and ### $p$  < 0.001 vs the group treated with only LPS. (C)

## Supplementary Figure S2

A

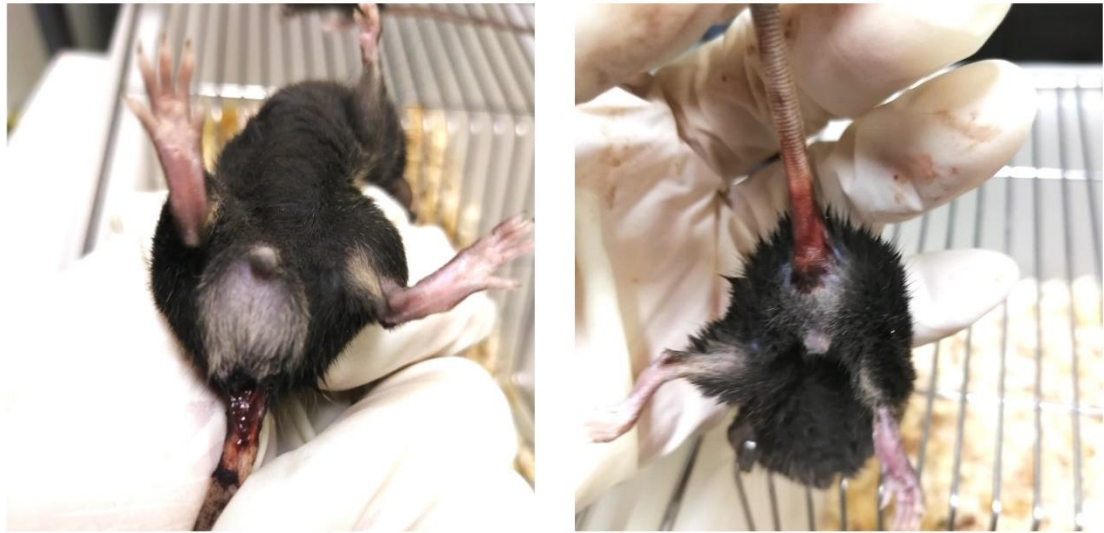

**Figure S2.** On the eighth day of DSS-induced modeling, hematochezia appeared in the mice. (A)

Supplementary Figure S3

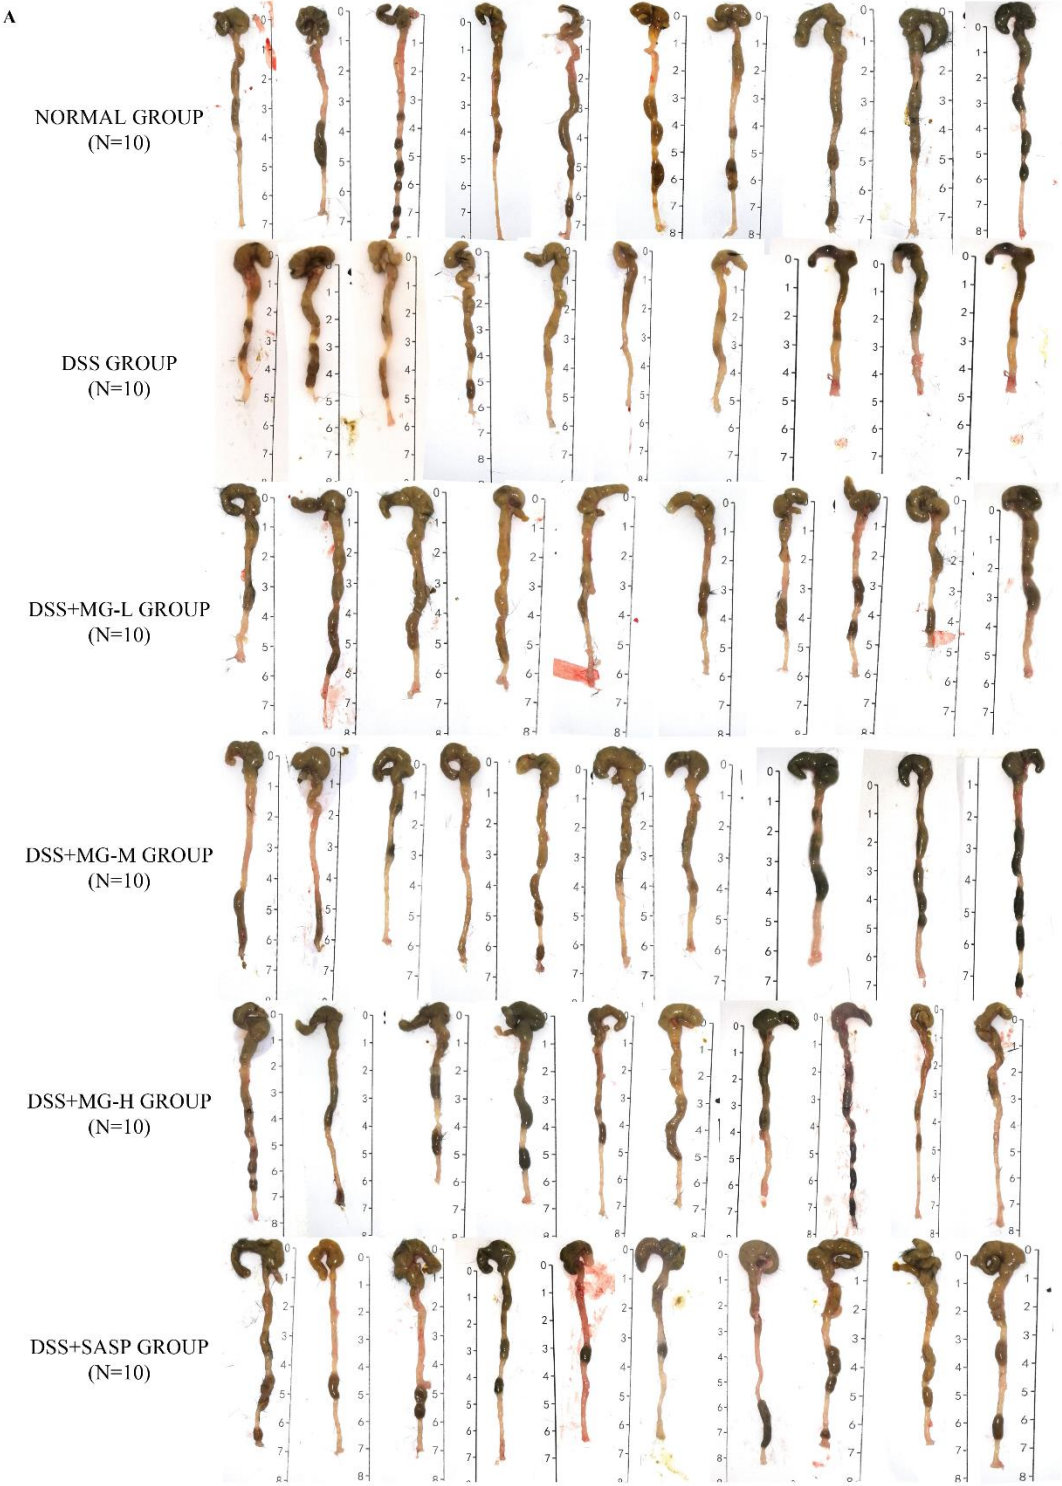

**Figure S2.** Colonic tissue of mice in each group. (A)

Table S1. Disease activity index score.

| Score | Weight loss (%) | Stool consistency     | Occult blood   |
|-------|-----------------|-----------------------|----------------|
| 0     | <0              | Normal                | Negative       |
| 1     | 1-5             | Soft but still formed | +              |
| 2     | 5-10            | Loose                 | ++             |
| 3     | 10-20           | Very soft and wet     | +++            |
| 4     | >20             | Diarrhea              | Gross bleeding |

Table S2. Primer sequences used for qPCR amplification.

| Gene name      | Primer type | Primer sequence          |
|----------------|-------------|--------------------------|
| $\beta$ -actin | Forwad      | CATTGCTGACAGGATGCAGAAGG  |
|                | Reverse     | TGCTGGAAGGTGGACAGTGAGG   |
| TNF $\alpha$   | Forwad      | GGTGCCTATGTCTCAGCCTCTT   |
|                | Reverse     | GCCATAGAACTGATGAGAGGGAG  |
| IL-1 $\beta$   | Forwad      | TGGACCTTCCAGGATGAGGACA   |
|                | Reverse     | GTTTCATCTCGGAGCCTGTAGTG  |
| IL6            | Forwad      | TACCACTTCACAAGTCGGAGGC   |
|                | Reverse     | CTGCAAGTGCATCATCGTTGTTC  |
| IL4            | Forwad      | ATCATCGGCATTTTGAACGAGGTC |
|                | Reverse     | ACCTTGGAAGCCCTACAGACGA   |
| IL10           | Forwad      | CGGGAAGACAATAACTGCACCC   |
|                | Reverse     | CGGTTAGCAGTATGTTGTCCAGC  |
| Arg-1          | Forwad      | CATTGGCTTGCGAGACGTAGAC   |
|                | Reverse     | GCTGAAGGTCTCTTCCATCACC   |
